# Supplementary material for: The impact of peripheral circulation characteristics of typhoon on sustained ozone episodes over the Pearl River Delta region, China
Source: Copernicus journal article supplement (doi:10.5194/acp-22-3861-2022), 2022-03-24
Supplement: Supplementary file 1 [file acp-22-3861-2022-supplement.pdf]

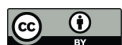

*Supplement of*

## **The impact of peripheral circulation characteristics of typhoon on sustained ozone episodes over the Pearl River Delta region, China**

**Ying Li et al.**

*Correspondence to:* Xiangjun Zhao ([iamzxj841025@163.com](mailto:iamzxj841025@163.com)) and Xuejiao Deng ([dxj@gd121.cn](mailto:dxj@gd121.cn))

The copyright of individual parts of the supplement might differ from the article licence.

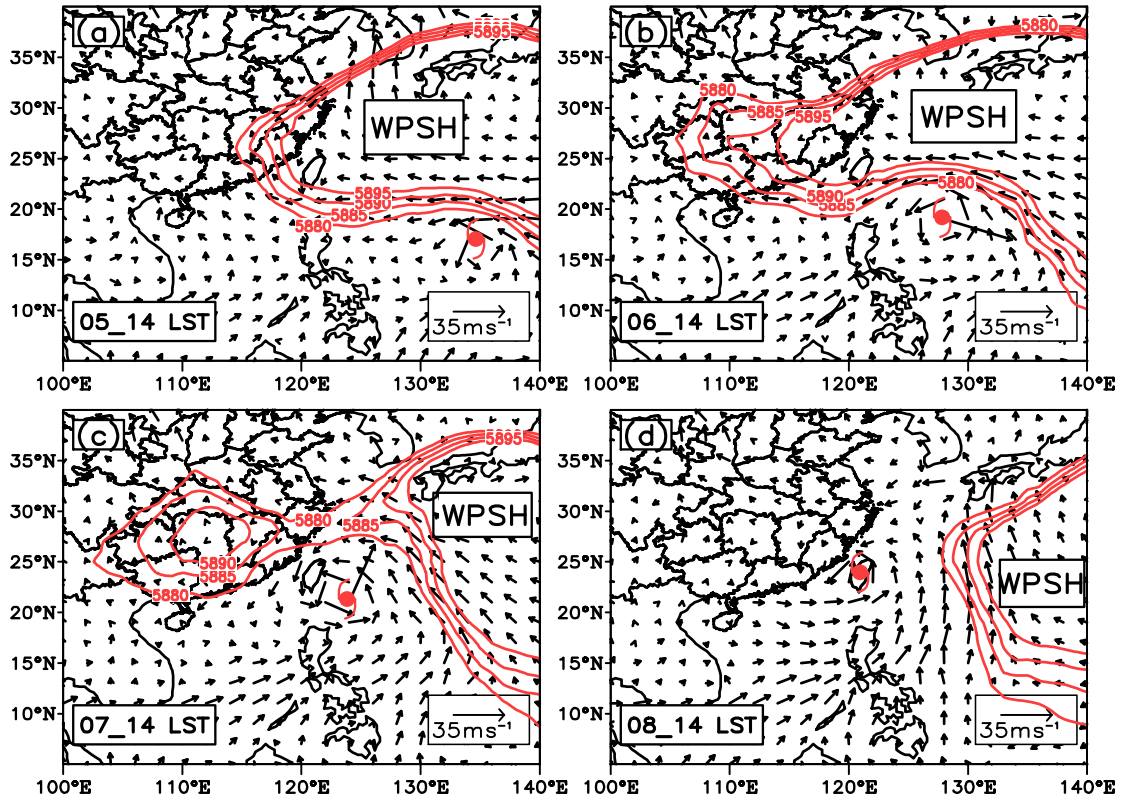

**Figure S1.** The 1000 hPa horizontal wind vector and the 500 hPa Geopotential height (unit: m/s) of NCEP-FNL data at 14:00 on 5 July (a), 6 July (b), 7 July (c) and 8 July (d); the red typhoon signs represent the moving typhoon center and the strings WPSH represent the location of WPSH.

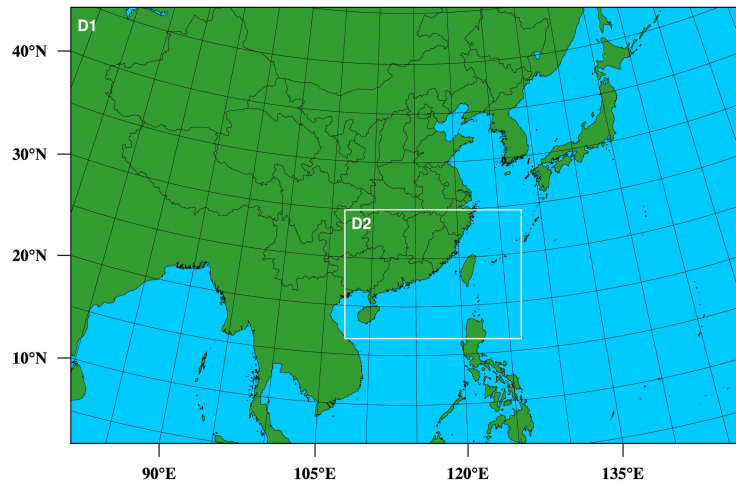

**Figure S2.** Map of the two nested model domains.

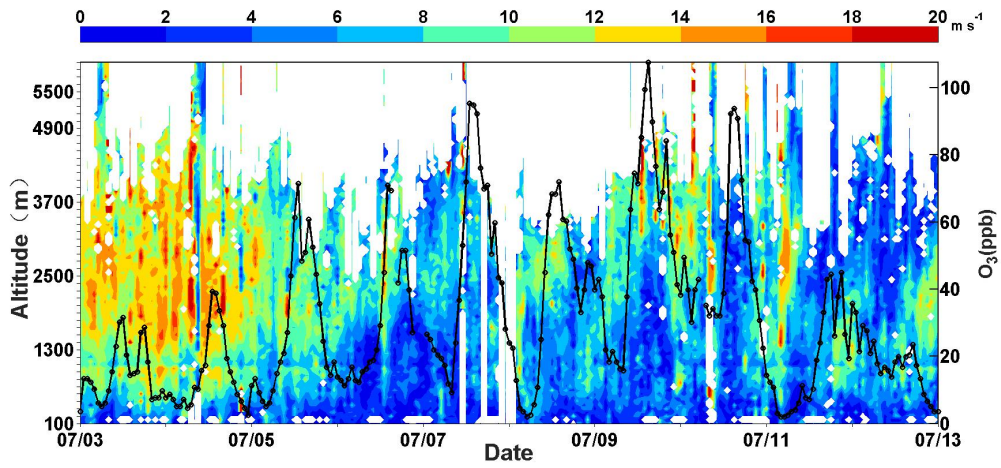

**Figure S3.** The profile evolution of horizontal wind speed of 59285 wind profile radar station in PRD from 3 July to 13 July; the black solid line denotes the surface ozone concentration.

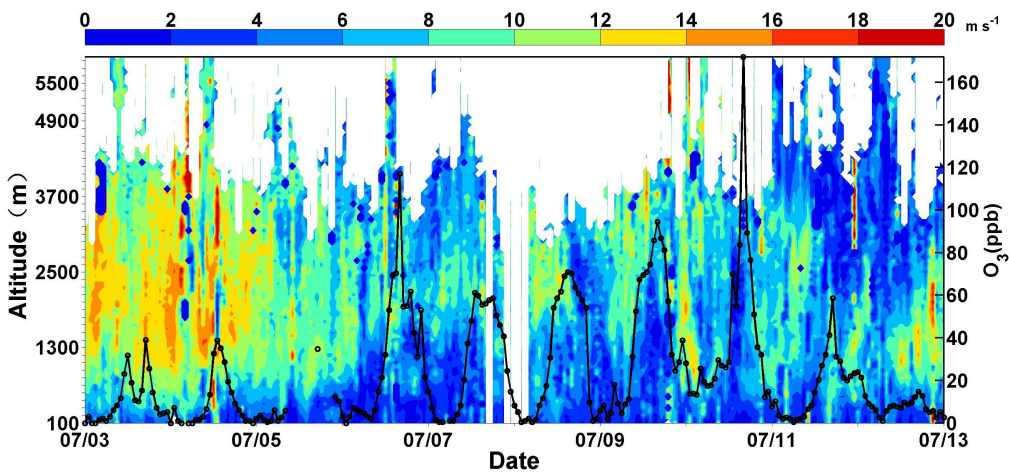

**Figure S4.** The profile evolution of horizontal wind speed of 59294 wind profile radar station in PRD from 3 July to 13 July; the black solid line denotes the surface ozone concentration.

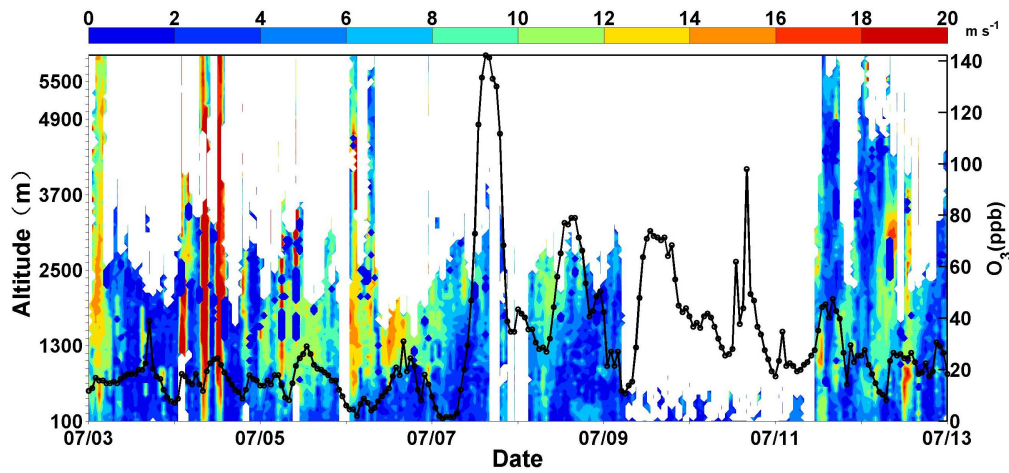

**Figure S5.** The profile evolution of horizontal wind speed of 59476 wind profile radar station in PRD from 3 July to 13 July; the black solid line denotes the surface ozone concentration.

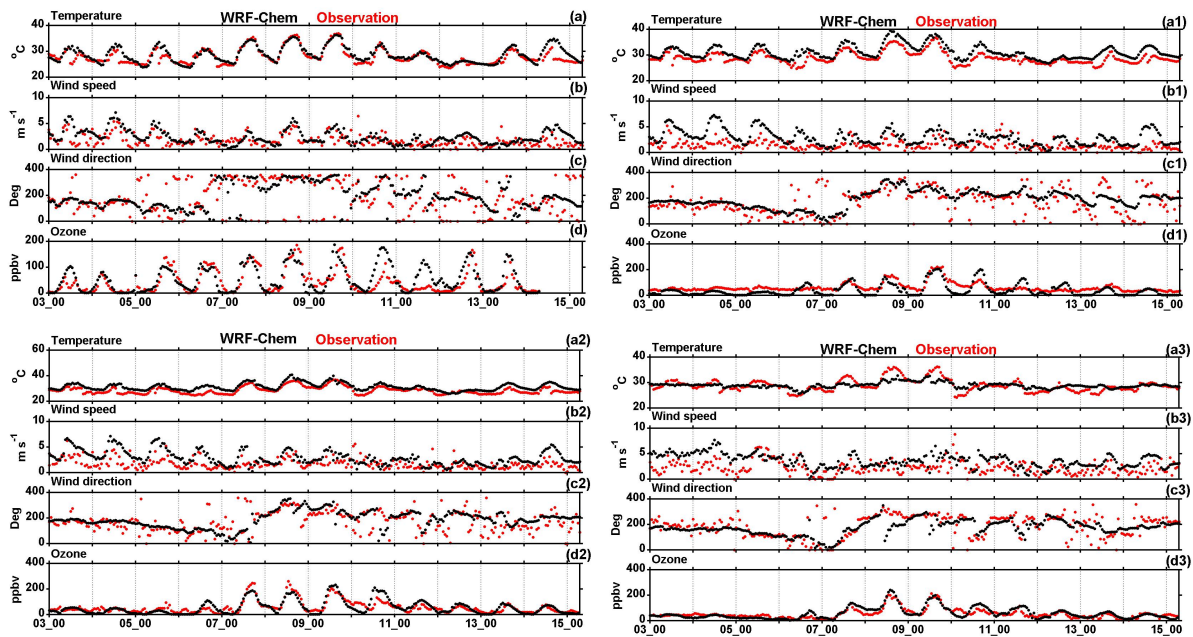

**Figure S6.** Comparison of measured (red dots) and simulated (black dots) data for temperatures, wind speeds, wind directions, and ozone concentrations at (a-d)Guangzhou, (a1-d1)Shenzhen, (a2-d2)Zhongshan and (a3-d3)Zhuhai.

### The derivation of $C_{d2} - C_{d1}$ :

In the numerical IPR analysis, the ozone concentration at any location at time  $t+1$  follows Eq.

(S1):

$$C_{t+1} = C_t + \text{SUM}_{t+1}, \quad (\text{S1})$$

where  $C_{t+1}$  and  $C_t$  are the ozone concentrations at time  $t+1$  and time  $t$ , respectively.

$\text{SUM}_{t+1}$  is the net change in contributions from all of the physical and chemical processes from time  $t$  to time  $t+1$ , and is shown in Eq. (S2):

$$\text{SUM}_{t+1} = \text{ADV}_{t+1} + \text{CHEM}_{t+1} + \text{VMIX}_{t+1} + \text{CONV}_{t+1}. \quad (\text{S2})$$

As specified in Eqs. (S1) and (S2), ozone concentration is a cumulative amount. Then, according to Eq. (S1), we obtain:

$$C_{t+24} - C_t = \sum_{j=1}^{j=24} \text{SUM}_{t+j}, (t = 08:00, 09:00, \dots, 20:00), \quad (\text{S3})$$

where  $C_t$  and  $C_{t+24}$  are the ozone concentrations at the corresponding time on two adjacent days. For example, if  $C_t$  is the ozone concentration at 8:00 in the morning on a certain day,  $C_{t+24}$  represents the ozone concentration at 8:00 in the next morning.  $\text{SUM}_{t+j}$  is the sum of the contributions from all of the physical and chemical processes at the corresponding time over the time slots. For example, when  $t$  is 08:00,  $\text{SUM}_{08+1}$  indicates the SUM at 9:00 in the morning, and  $\text{SUM}_{08+24}$  indicates the SUM at 8:00 in the next morning. To give the daytime average ozone concentration difference of two adjacent days, we use 08:00 and 20:00 as the daytime and nighttime boundaries to reprocess the hourly data into a half-day average. If the daytime average ozone concentrations for two adjacent days are denoted as  $C_{d1}$  and  $C_{d2}$ , the difference between the daytime average ozone concentrations on two adjacent days can be further expressed by three continuous contribution terms from 09:00 on the first day (d1) to 20:00 on the second day (d2):

$$C_{d2} - C_{d1} = \frac{1}{N} \sum_{t1=09}^{t1=20} (t1-8) \cdot \text{SUM}_{t1} + \sum_{t2=21}^{t2=08} \text{SUM}_{t2} + \frac{1}{N} \sum_{t3=09}^{t3=20} (21-t3) \cdot \text{SUM}_{t3}, \quad (\text{S4})$$

where  $C_{d2}$  and  $C_{d1}$  are the daytime average ozone concentrations on two adjacent days.

According to Eq. (S2), Eq. (S4) can be further decomposed into the following form:

$$\begin{aligned} C_{d2} - C_{d1} = & \frac{1}{N} \sum_{t1=09}^{t1=20} (t1-8) \cdot \text{CHEM}_{t1} + \sum_{t2=21}^{t2=08} \text{CHEM}_{t2} + \frac{1}{N} \sum_{t3=09}^{t3=20} (21-t3) \cdot \text{CHEM}_{t3} \\ & + \frac{1}{N} \sum_{t1=09}^{t1=20} (t1-8) \cdot \text{VMIX}_{t1} + \sum_{t2=21}^{t2=08} \text{VMIX}_{t2} + \frac{1}{N} \sum_{t3=09}^{t3=20} (21-t3) \cdot \text{VMIX}_{t3} \\ & + \frac{1}{N} \sum_{t1=09}^{t1=20} (t1-8) \cdot \text{CONV}_{t1} + \sum_{t2=21}^{t2=08} \text{CONV}_{t2} + \frac{1}{N} \sum_{t3=09}^{t3=20} (21-t3) \cdot \text{CONV}_{t3} \\ & + \frac{1}{N} \sum_{t1=09}^{t1=20} (t1-8) \cdot \text{ADV}_{t1} + \sum_{t2=21}^{t2=08} \text{ADV}_{t2} + \frac{1}{N} \sum_{t3=09}^{t3=20} (21-t3) \cdot \text{ADV}_{t3}. \end{aligned} \quad (\text{S5})$$

The decomposed items are respectively denoted as:

$$\text{TOTAL\_SUM\_CHEM} = \frac{1}{N} \sum_{t1=09}^{t1=20} (t1-8) \cdot \text{CHEM}_{t1} + \sum_{t2=21}^{t2=08} \text{CHEM}_{t2} + \frac{1}{N} \sum_{t3=09}^{t3=20} (21-t3) \cdot \text{CHEM}_{t3},$$

$$\text{TOTAL\_SUM\_VMIX} = \frac{1}{N} \sum_{t1=09}^{t1=20} (t1-8) \cdot \text{VMIX}_{t1} + \sum_{t2=21}^{t2=08} \text{VMIX}_{t2} + \frac{1}{N} \sum_{t3=09}^{t3=20} (21-t3) \cdot \text{VMIX}_{t3},$$

$$\text{TOTAL\_SUM\_CONV} = \frac{1}{N} \sum_{t1=09}^{t1=20} (t1-8) \cdot \text{CONV}_{t1} + \sum_{t2=21}^{t2=08} \text{CONV}_{t2} + \frac{1}{N} \sum_{t3=09}^{t3=20} (21-t3) \cdot \text{CONV}_{t3},$$

$$\text{TOTAL\_SUM\_ADV} = \frac{1}{N} \sum_{t1=09}^{t1=20} (t1-8) \cdot \text{ADV}_{t1} + \sum_{t2=21}^{t2=08} \text{ADV}_{t2} + \frac{1}{N} \sum_{t3=09}^{t3=20} (21-t3) \cdot \text{ADV}_{t3}.$$

Equation (S5) shows that the daytime average ozone concentration difference of two adjacent days

is determined by TOTAL\_SUM\_CHEM, TOTAL\_SUM\_VMIX, TOTAL\_SUM\_CONV and

TOTAL\_SUM\_ADV.
